# Supplementary material
Source: PubMed Central journal article supplement (PMC4662048)
Supplement: NIHMS704482-supplement-supplement_1.pdf [file NIHMS704482-supplement-supplement_1.pdf]

**Table S1.** Results from the G x E x Age analyses examining the interaction between 5-*HTTLPR* and peer stress and age predicting onset of depression diagnosis over 3 years.

|                                              | Wald  | p    | B    | OR   |
|----------------------------------------------|-------|------|------|------|
| <i>Step 1</i>                                |       |      |      |      |
| Child Gender                                 | 8.13  | .004 | .71  | 2.02 |
| Child Pubertal Status                        | .86   | .35  | .39  | 1.32 |
| Child Age                                    | 17.68 | .001 | .34  | 1.41 |
| Self-reported Race                           | 1.29  | .26  | 1.15 | .90  |
| Past Depression                              | 21.80 | .001 | 1.17 | 3.22 |
| Peer Chronic Stress                          | 39.64 | .001 | 1.48 | 4.39 |
| 5- <i>HTTLPR</i>                             | 1.45  | .29  | .18  | 1.20 |
| <i>Step 2</i>                                |       |      |      |      |
| 5- <i>HTTLPR</i> x Peer Chronic Stress       | 8.09  | .004 | .27  | 1.32 |
| Peer Chronic Stress X Age                    | .01   | .91  | .01  | 1.01 |
| 5- <i>HTTLPR</i> x Age                       | 1.29  | .25  | .36  | 1.43 |
| <i>Step 3</i>                                |       |      |      |      |
| 5- <i>HTTLPR</i> x Peer Chronic Stress x Age | 4.02  | .04  | .07  | 1.15 |

N = 618. Genotype group N's: SS=133, SL=293, LL=192. 5-*HTTLPR*: Serotonin transporter promoter gene. Race is coded as Caucasian and non-Caucasian.
